# Supplementary material
Source: PubMed Central journal article supplement (PMC3422865)
Supplement: NIHMS393494-supplement-Supplemental_figure_S1.pdf [file NIHMS393494-supplement-Supplemental_figure_S1.pdf]

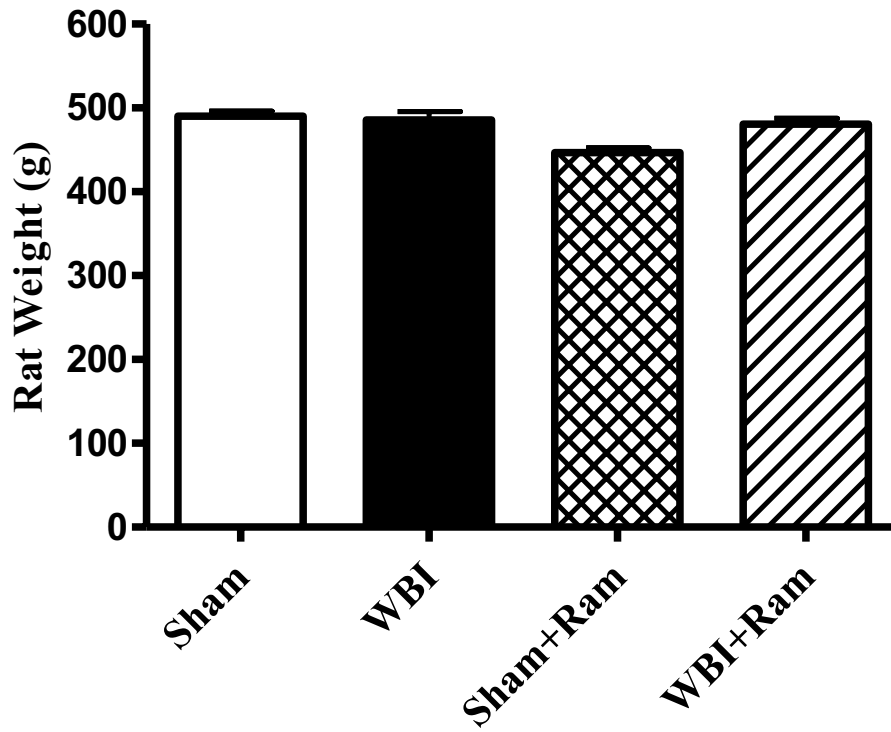

**Supplemental Figure e1.** Rat body weights attained during the experiment were not significantly different between the fWBI groups. The body weight for the Sham+Ramipril group was significantly different ( $p<0.05$ ) from all other groups.
